# Supplementary material for: Insights on the Evolutionary History and Genetic Patterns of Octopus vulgaris Cuvier, 1797 in the Northeastern Atlantic Using Mitochondrial DNA
Source: MDPI journal article supplement (doi:10.3390/ani13172708), 2023-08-25
Supplement: s1 [file s1]

**Figure S1. *Cox1* haplotype network**

built using Median Joining algorithm in Network for the octopus' haplotypes found in the 93 samples analyzed. Circles represent different haplotypes and size is proportional to its frequency. Colors indicate each population.

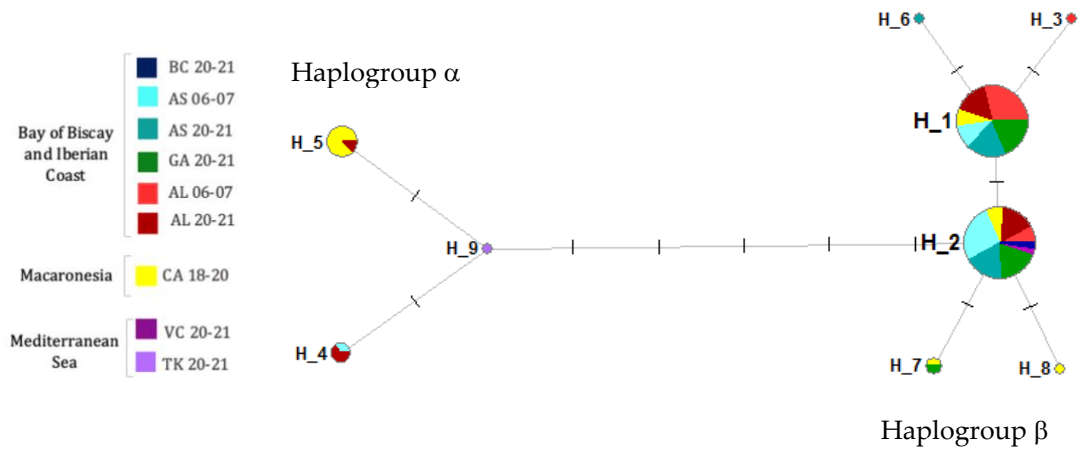

**Table S1. Summary of the sequence differences between haplotypes from the concatenated dataset.**

The numbers made referent to the position of the variable site within the concatenated sequence. In blue the variable sites from *cox1* sequence and in black the variable sites from the CR sequence. The name of the haplotypes belonging to  $\alpha$  haplogroup is depicted in black. The frequency of each haplotype (freq.) is also included in the table.

| Variable sites and position within the concatenated sequence |                                                    |       |
|--------------------------------------------------------------|----------------------------------------------------|-------|
|                                                              | 1133344456666666777777777788888889911111111111111  |       |
|                                                              | 114947943444588011246788901257770700000000011112   |       |
|                                                              | 036728324168408916377119036970472302456688800355   |       |
| Haplotype                                                    |                                                    | Freq. |
| H_1                                                          | CTTTCTTACCCCTCTGTTTATCCTACCACCGTTAGACTTCTGCGCTCT   | 24    |
| H_2                                                          | CTTTCTTACCCCTCTGTTTATCTTACCACCGTTAGACTTCTGCGCTCT   | 10    |
| H_3                                                          | CTTTCTTACCCTCCTCGTTTATCCTACAACCGTTAGACTTCTGCGCTCT  | 26    |
| H_4                                                          | CTTTCTTACCCCTCATTTATCCTACCACCGTTAGACTTCTGCGCTCT    | 1     |
| H_5                                                          | CTTTTCTACCCCTCTGTTTATCCTACCACCGTTAGACTTCTGCGCTCT   | 1     |
| H_6                                                          | CTTTCTTACCCTCCTCGTTTATCCTACCACCGTTAGACTTCTGCGCTCT  | 4     |
| H_7                                                          | CTTTCTTACCCTCCTCGTTTATCCTACCACCGATAGACTTCTGCGCTCT  | 2     |
| H_8                                                          | CTTTCTTACCCCTCTGTTTACCTTACCACCGTTAGACTTCTGCGCTCT   | 1     |
| H_9                                                          | TCATCCTATTCTCACCGCCTGTTCTGTAGTCATCAAACCCTCATTTTCCT | 3     |
| H_10                                                         | CTTTCTTACCCTCCTCGTTTATCCTACCGCCGTTAGACTTCTGCGCTCT  | 2     |
| H_11                                                         | CTTTCTTACCCTCCTCGTTTATCCTACCACCGTTGGGCTTCTGCGCTCT  | 1     |
| H_12                                                         | TCATCCTATCTTCCCTACCCGTTCTGCAGTCGTCAAAGCCCCATTTTCCT | 7     |
| H_13                                                         | CTTTCTTACCCTCCTCGTTTATCCTACAACGTTAGACTTCTGCGCTCT   | 1     |
| H_14                                                         | CTTTCTTACCCTCCTCGTTTATCCTACCACCGTCAGACTTCTGCGCTCT  | 1     |
| H_15                                                         | CTTTCTTGCCCCCTCTGTTTATCCTACCACCGTTAGACTTCTGCGCTCT  | 1     |
| H_16                                                         | CTTACTTACCCTTCTCGTTTATCCCACCACCGTTAGACTTCTGCGCTCT  | 1     |
| H_17                                                         | TCATCCTATCTTCCCTACCCGTTCTGCAGTCGTCAAAGCCCCATTTCCC  | 1     |
| H_18                                                         | CTTTCTCACCCCTCCTCGTTTATCCTACAACCGTTAGACTTCTGCGCTCT | 1     |
| H_19                                                         | CTTTCTTACCCCTCTGTTTATCCTACCACCATAGACTTCTGCGCTCT    | 2     |
| H_20                                                         | CTTTCTTACCCTCCTCGTTTATCCTACCGCCGTTAGACTTCTGCGCCCT  | 1     |
| H_21                                                         | CTTACTTACCCTCCTCGTTTATCCTACAACCGTTAGACTTCTGCGCTTT  | 1     |
| H_22                                                         | TCATCCTATCCTCACCGCCTGTTCTGTAGTCATCAAACCCTCATTTTCCT | 1     |

**Table S2. Population pairwise  $\phi_{ST}$  values from *cox1* in octopus' samples.**

$\phi_{ST}$  values, using pairwise comparisons as distance method, are located below diagonal and above diagonal their correspondent p-values (italics). Significance (\* $p < 0.05$ ). Significance after Bonferroni correction (cut off value  $p < 0.0033$ ) in bold.

|                          | Asturias<br>2006-2007 | Asturias<br>2020-2021 | Galicia<br>2020-2021 | Algarve<br>2006-2007 | Algarve<br>2020-2021 | Canary Islands<br>2018-2021 |
|--------------------------|-----------------------|-----------------------|----------------------|----------------------|----------------------|-----------------------------|
| Asturias 2006-2007       |                       |                       | <i>0.25978</i>       | <i>0.44431</i>       | <i>0.00861</i>       | <i>0.35531</i>              |
| Asturias 2020-2021       | 0.04300               |                       | <i>0.99990</i>       | <i>0.24017</i>       | <i>0.17167</i>       | <i>0.00119</i>              |
| Galicia 2020-2021        | 0.00933               | -0.04895              |                      | <i>0.13226</i>       | <i>0.24037</i>       | <i>0.00307</i>              |
| Algarve 2006-2007        | 0.24908*              | 0.06832               | 0.12536              |                      | <i>0.02465</i>       | <i>0.00020</i>              |
| Algarve 2020-2021        | 0.00784               | 0.07626               | 0.06926              | 0.15537*             |                      | <i>0.06019</i>              |
| Canary Islands 2018-2021 | 0.27538*              | <b>0.36418*</b>       | <b>0.35522*</b>      | <b>0.41770*</b>      | 0.10293              |                             |

**Table S3. Population pairwise  $\phi_{ST}$  values from CR in octopus' samples.**

$\phi_{ST}$  values, using pairwise comparisons as distance method, are located below diagonal and above diagonal their correspondent p-values (italics). Significance (\* $p < 0.05$ ). Significance after Bonferroni correction (cut off value  $p < 0.0033$ ) in bold.

|                          | Asturias<br>2006-2007 | Asturias<br>2020-2021 | Galicia<br>2020-2021 | Algarve<br>2006-2007 | Algarve<br>2020-2021 | Canary Islands<br>2018-2021 |
|--------------------------|-----------------------|-----------------------|----------------------|----------------------|----------------------|-----------------------------|
| Asturias 2006-2007       |                       |                       | <i>0.25730</i>       | <i>0.34185</i>       | <i>0.00822</i>       | <i>0.45203</i>              |
| Asturias 2020-2021       | 0.01058               |                       | <i>0.99990</i>       | <i>0.21077</i>       | <i>0.11712</i>       | <i>0.00149</i>              |
| Galicia 2020-2021        | 0.00270               | -0.04978              |                      | <i>0.10187</i>       | <i>0.10544</i>       | <i>0.00149</i>              |
| Algarve 2006-2007        | 0.10147*              | 0.03509               | 0.07656              |                      | <i>0.01346</i>       | <i>0.00020</i>              |
| Algarve 2020-2021        | -0.00279              | 0.09650               | 0.09608              | 0.13592*             |                      | <i>0.05396</i>              |
| Canary Islands 2018-2021 | 0.28215*              | <b>0.38766*</b>       | <b>0.38857*</b>      | <b>0.41558*</b>      | 0.11231              |                             |
